# Supplementary material for: Identification and Characterization of Neuroprotective Properties of Thaumatin-like Protein 1a from Annurca Apple Flesh Polyphenol Extract
Source: MDPI journal article supplement (doi:10.3390/nu16020307), 2024-01-19
Supplement: s1 [file s1]

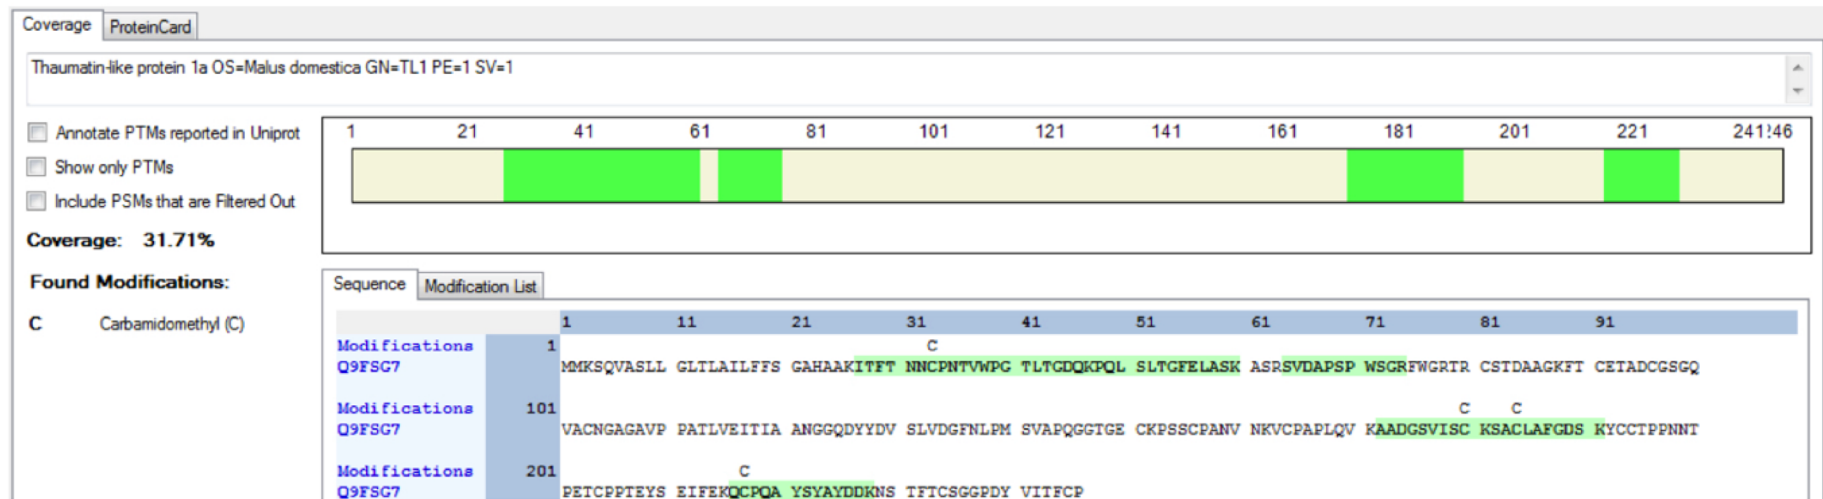

| Accession | Description                                                   | Coverage | # Peptides | # PSMs | # Unique Peptides | # AAs | MW [kDa] | calc. pI | Score Sequest HT | # Peptides Sequest HT |
|-----------|---------------------------------------------------------------|----------|------------|--------|-------------------|-------|----------|----------|------------------|-----------------------|
| Q9FSG7    | Thaumatococcus protein 1a OS=Malus domestica GN=TL1 PE=1 SV=1 | 31       | 5          | 6      | 5                 | 246   | 25,683   | 5,15     | 12,0395534       | 5                     |

| Annotated Sequence                         | Modifications       | # Protein Groups | # Proteins | Master Protein Accessions | # Missed Cleavages | Charge | m/z [Da] | MH+ [Da] | DeltaM [ppm] | RT [min] |
|--------------------------------------------|---------------------|------------------|------------|---------------------------|--------------------|--------|----------|----------|--------------|----------|
| [K].QcPQAYSAYDDK.[N]                       | C2(Carbamidomethyl) | 1                | 2          | Q9FSG7                    | 0                  | 2      | 804,8347 | 1608,662 | -0,83398     | 12,57942 |
| [K].AADGSVISK.[S]                          | C9(Carbamidomethyl) | 1                | 2          | Q9FSG7                    | 0                  | 2      | 504,2451 | 1007,483 | 0,394488     | 11,09707 |
| [K].SACLAFGDSK.[Y]                         | C3(Carbamidomethyl) | 1                | 2          | Q9FSG7                    | 0                  | 2      | 528,2454 | 1055,483 | 0,781336     | 12,91876 |
| [K].AADGSVISK.[S]                          | C9(Carbamidomethyl) | 1                | 2          | Q9FSG7                    | 0                  | 2      | 504,2448 | 1007,482 | -0,21133     | 11,25774 |
| [R].SVDAPSPWSGR.[F]                        |                     | 1                | 2          | Q9FSG7                    | 0                  | 2      | 579,781  | 1158,555 | 0,79669      | 13,25838 |
| [K].ITFTNNcPNTVWPGTLTGDKPQLSLTGFEELASK.[A] | C7(Carbamidomethyl) | 1                | 1          | Q9FSG7                    | 0                  | 4      | 934,7219 | 3735,866 | -0,82041     | 16,42328 |

**Figure S2:** Amino acid sequences of tryptic peptides mapped on Thaumatococcus protein 1a identified by high-resolution nanoLC-Tandem Mass Spectrometry (AC: Q9FSG7). Within the Table, sequences, number of missed cleavages sites (MC), experimental masses of precursor ions, charge state, experimental and theoretical molecular weights of peptides (MH+) together with mass accuracies and retention times are reported. c = carbamidomethyl cysteine.

>sp|Q9FSG7|TP1A\_MALDO Thaumatin-like protein 1a OS=Malus domestica OX=3750 GN=TL1 PE=1 SV=1  
Sequence ID: Query\_8427 Length: 246  
Range 1: 2 to 246

Score:157 bits(398), Expect:2e-52,  
Method:Compositional matrix adjust.,  
Identities:97/249(39%), Positives:136/249(54%), Gaps:27/249(10%)

|       |     |                                                               |     |
|-------|-----|---------------------------------------------------------------|-----|
| Query | 1   | MGNLRSSFVFFLLALVTYT--YAATIEVRNNCPYTVWAASTPIGGGRRLDRGQTWVINAP  | 58  |
|       |     | M + +S + LA++ ++ +AA I NNCP TVW + + G ++ T A                  |     |
| Sbjct | 2   | MKSQVASLLGLTLAILFFSGAHAAKITFTNNCPNTVWPGT--LTGDQKPQLSLTGFELAS  | 59  |
| Query | 59  | RGTKMA-----RVWGRNTCNFNAAGRGTCTGDCG--GVLQCTGWGK--PPNTLAEYAL    | 108 |
|       |     | + ++ R WGR T C+ +AAG+ TC+T DCG G + C G G PP TL E +            |     |
| Sbjct | 60  | KASRSVDAPSPWSGRFWRTRCSTDAAGKFTCETADCGSGQVACNGAGAVPPATLVEITI   | 119 |
| Query | 109 | DQFSGLDLFDISLVDGFNIPMTFAPTNPSGGKCHAIHCTANINGECPRELVPVG-----   | 163 |
|       |     | G D++D+SLVDGFN+PM+ AP +G +C C AN+N CP L+V                     |     |
| Sbjct | 120 | AANGGQDYDVS LVDGFNL PMSVAPQGGTG--ECKPSSCPANVNKVCAPLQVKAADGSVI | 178 |
| Query | 164 | -CNNPCTTFGGQQYCCTQ-----GPCGPTFFSKFFKQRCPDAYSYPQDDPTSTFTCPGGS  | 217 |
|       |     | C + C FG +YCCT C PT +S+ F+++CP AYSY DD STFTC GG               |     |
| Sbjct | 179 | SCKSACLAFGDSKYCCTPPNNTPETCPTEYSEIFEKQCPQAYSAYDDKNSTFTCSGGP    | 238 |
| Query | 218 | TNYRVIFCP 226                                                 |     |
|       |     | +Y + FCP                                                      |     |
| Sbjct | 239 | -DYVITFCP 246                                                 |     |

**Figure S3:** Pairwise protein sequence alignment between Osmotin (accession number Q40529) and Thaumatin-like 1a protein (accession number Q9FSG7) was performed by query on RCSB PDB Protein Data Bank.



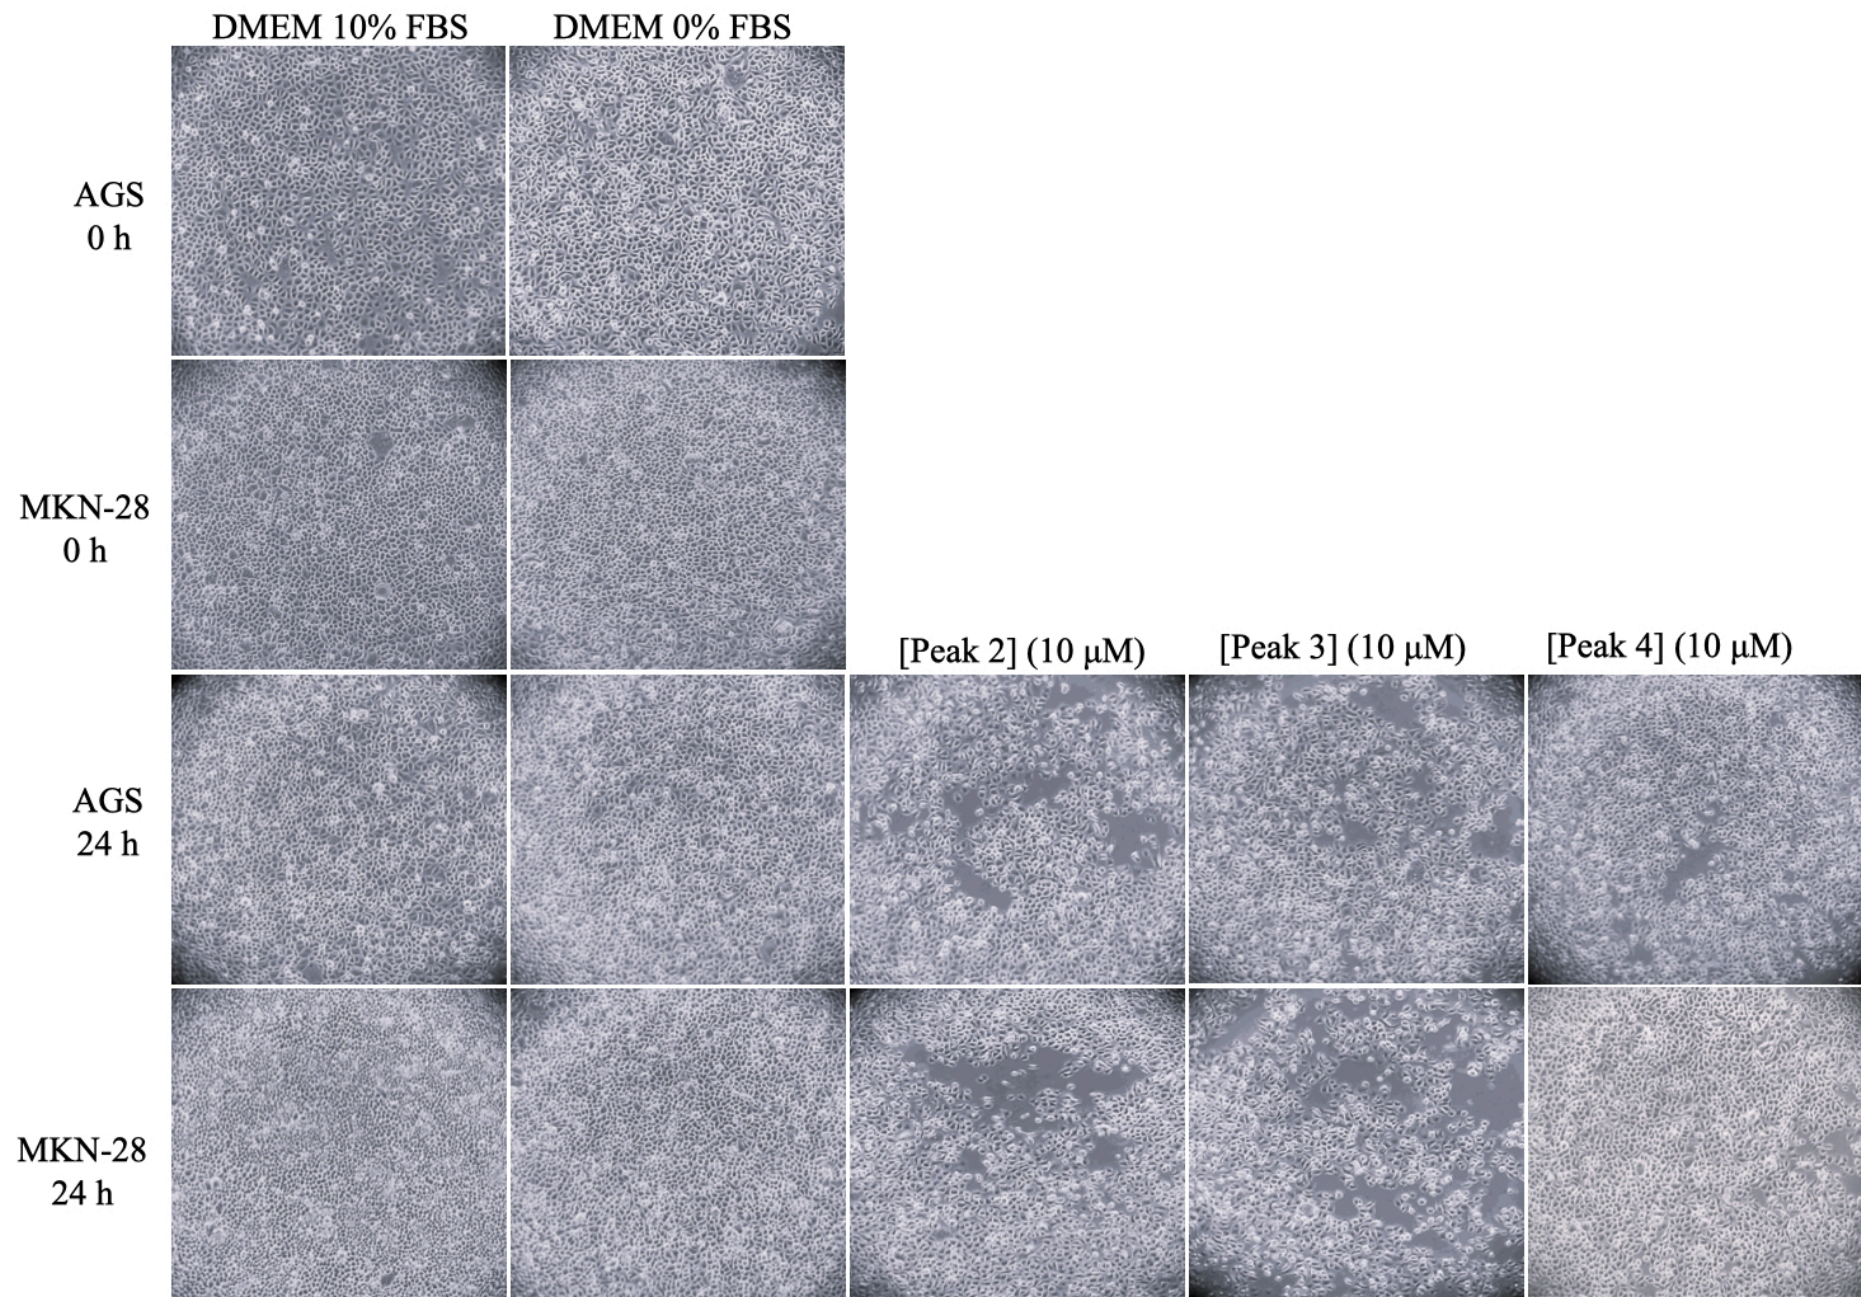

**Figure S4:** Effects of Peaks 2-4 on AGS and MKN-28 cell morphology. Cells kept in serum-free medium were treated with the indicated concentration of each sample, for 24 h and then subjected to cell morphology analysis. Representative images of AGS and MKN-28 cells captured at time 0 and 24 h by a phase-contrast microscope (10  $\times$  objective). Cells kept in serum-free conditions (DMEM 0% FBS) were treated with the indicated concentration of each Peak.

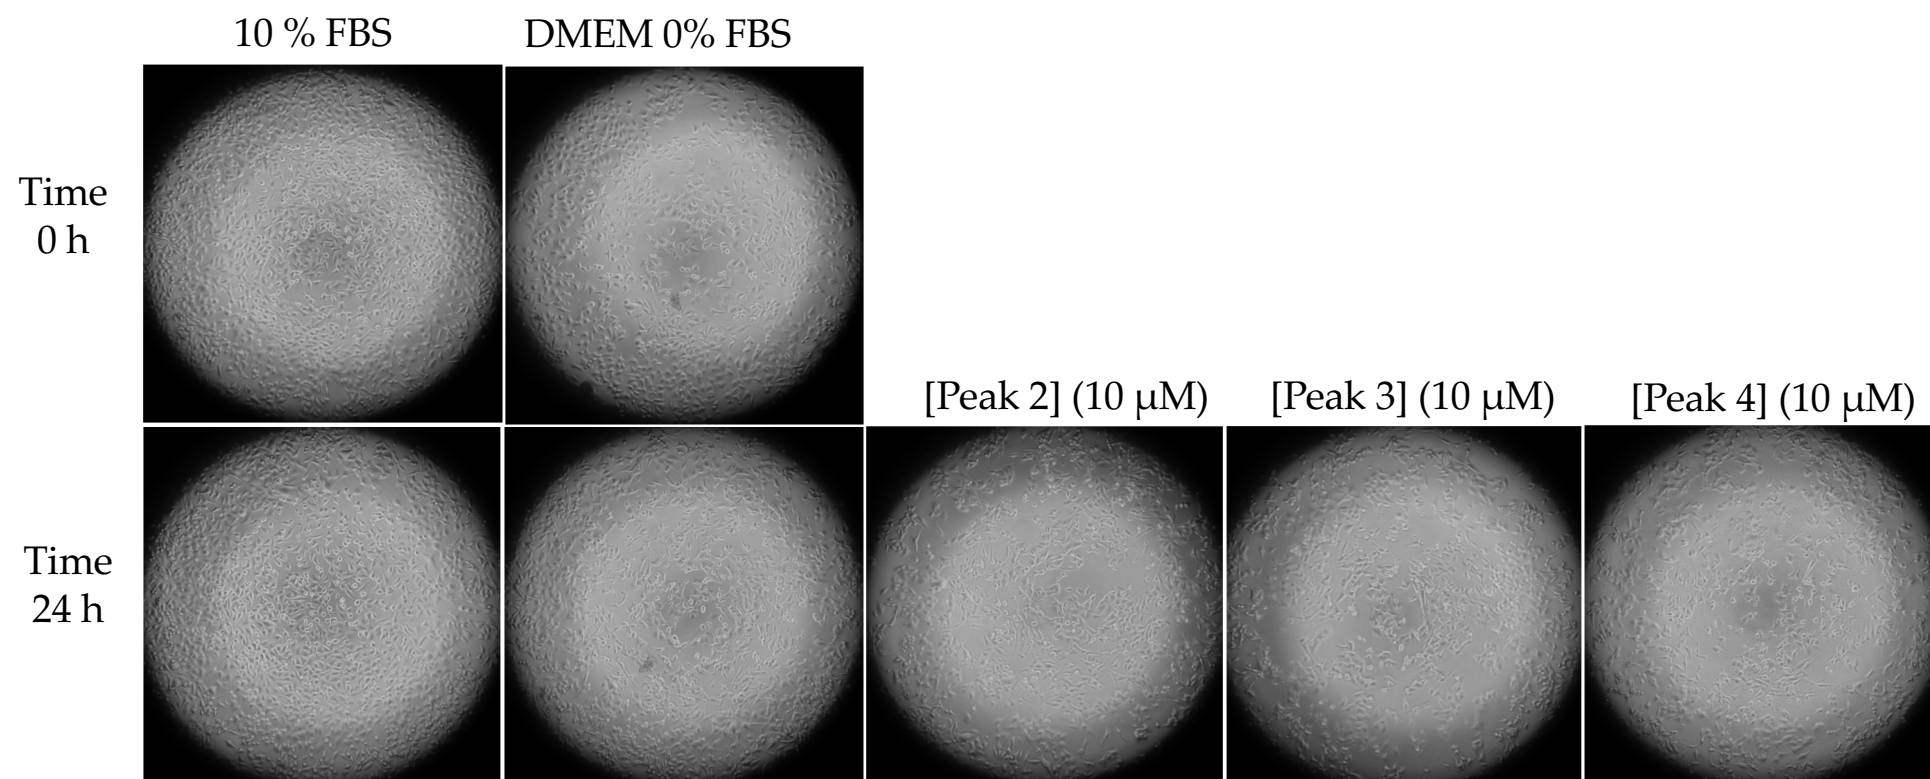

**Figure S5:** Effects of Peaks 2-4 on SH-SY5Y cell morphology. Cells plated onto 96-well plate were exposed to the indicated concentration of each sample, for 24 h and then subjected to cell morphology observation. Representative images of cells captured at time 0 and 24 h by phase-contrast microscopy (10  $\times$  objective).
